# Supplementary material
Source: PubMed Central journal article supplement (PMC2757987)
Supplement: supp_M109.033472_jbc.M109.033472-1.pdf [file supp_M109.033472_jbc.M109.033472-1.pdf]

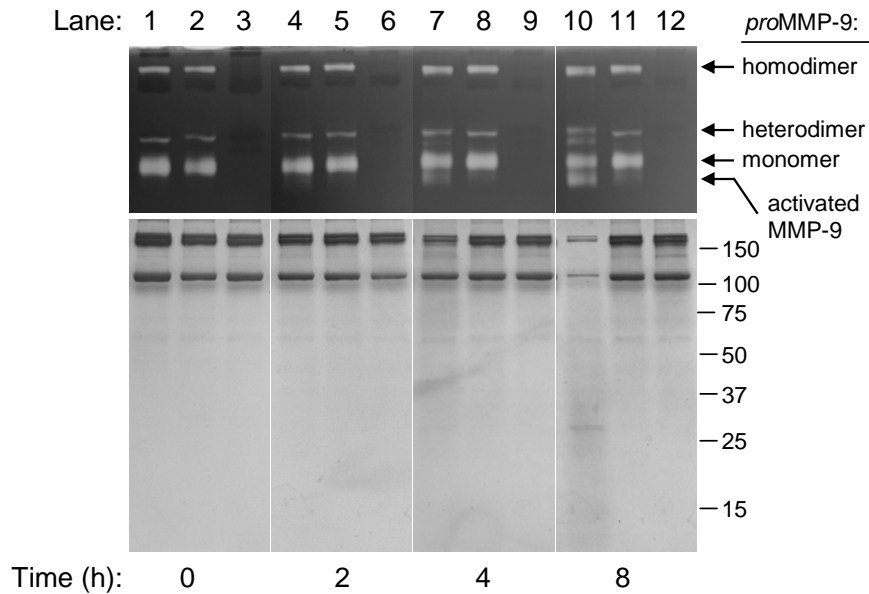

Suppl. Figure 1. Time course of MMP-3-mediated activation and gelatinolytic activity of neutrophil *proMMP-9* and *proMMP-9*/TIMP-1 complex in 3-dimensional collagen onplants *in vitro*. TIMP-free *proMMP-9* (lanes 1, 4, 7, and 10) and *proMMP-9* in a 1:1 stoichiometric complex with TIMP-1 (lanes 2, 5, 8, and 11) were incorporated at 3 nM into a collagen/gelatin mixture containing active MMP-3 at 1:10 molar ratio to *proMMP-9*. Control collagen/gelatin mixture was supplemented with MMP-3 only (lanes 3, 6, 9, and 12). The mixtures were incubated at 37°C for indicated time intervals (h) and analyzed by gelatin zymography (*top panels*) and SDS-PAGE under reducing conditions followed by Coomassie staining of the gel (*bottom panels*).
